## **Unsupervised clustering of SARS-CoV-2 positive hospitalized patients identifies six endophenotypes of COVID-19 and points to FGFR and SHC4-signaling in acute respiratory distress syndrome**

William Ma<sup>1,\*</sup>, Antoine Soulé<sup>1,\*</sup>, Katelyn Liu<sup>2</sup>, Catherine Allard<sup>3</sup>, Karine Tremblay<sup>4,†</sup>, Simon Rousseau<sup>2,†</sup>, and Amin Emad<sup>1,5,†</sup>

\* These authors contributed equally.

<sup>1</sup> Department of Electrical and Computer Engineering, McGill University, Montréal, QC, Canada

<sup>2</sup> The Meakins-Christie Laboratories at the Research Institute of the McGill University Health Centre Research Institute, & Department of Medicine, Faculty of Medicine, McGill University, Montréal, QC, Canada

<sup>3</sup> Statistical department, Centre de recherche du Centre hospitalier universitaire de Sherbrooke (CRCHUS), Sherbrooke, Canada.

<sup>4</sup> Pharmacology-physiology Department, Faculty of Medicine and Health Sciences, Université de Sherbrooke, Saguenay, QC, Canada; Centre intégré universitaire de santé et de services sociaux du Saguenay-Lac-Saint-Jean, Saguenay, QC, Canada; CRCHUS, Sherbrooke, Canada.

<sup>5</sup> Mila, Quebec AI Institute, Montréal, QC, Canada

† Corresponding Authors:

Amin Emad,  
755 McConnell Engineering Building, 3480 University Street, Montreal H3A 0E9, Canada  
Email: amin.emad@mcgill.ca

Simon Rousseau,  
RI-MUHC, E M3.2244, 1001 Décarie, Montréal H4A 3J1, Canada,  
Email: simon.rousseau@mcgill.ca

Karine Tremblay,  
Pavillon des Augustines, local AUG-5-01A, 225 St-Vallier street, Chicoutimi G7H 7P2, Canada  
Email: karine.tremblay@usherbrooke.ca

## 1 **Abstract**

2 Defining the molecular mechanisms of novel emerging diseases like COVID-19 is crucial to identify  
3 treatable traits to improve patient care. To circumvent a priori bias and the lack of in-depth  
4 knowledge of a new disease, we opted for an unsupervised approach, using the detailed  
5 circulating proteome, as measured by 4985 aptamers (SOMAmers), of 731 SARS-CoV-2 PCR-  
6 positive hospitalized participants to *Biobanque québécoise de la COVID-19 (BQC19)*. The  
7 consensus clustering identified six endophenotypes (EPs) present in this cohort, with varying  
8 degrees of disease severity. One endophenotype, EP6, was associated with a greater proportion  
9 of ICU admission, mechanical ventilation, acute respiratory distress syndrome (ARDS) and death.  
10 Clinical features of this endophenotype, showed increased levels of C-reactive protein, D-dimers,  
11 elevated neutrophils, and depleted lymphocytes. Moreover, metabolomic analysis supported a  
12 role for immunothrombosis in severe COVID-19 ARDS. Furthermore, the approach enabled the  
13 identification of Fibroblast Growth Factor Receptor (FGFR) and SH2-containing transforming  
14 protein 4 (SHC4) signaling as features of the molecular pathways associated with severe COVID-  
15 19. Finally, this information was sufficient to train an accurate predictive model solely based on  
16 clinical laboratory measurements, suggesting the use of blood markers as surrogates for  
17 generalizing these EPs to new patients and automating identification of high-risk groups in the  
18 clinic.

## 19 Introduction

20 The coronavirus disease 2019 (COVID-19) is a new human disease caused by the coronavirus  
21 SARS-CoV-2 infection that has been assessed pandemic by the World Health Organization in  
22 March 2020. As SARS-CoV-2 infection spread, a breath of outcomes of the infection became  
23 apparent, from asymptomatic individuals to severely ill and dying, from complete recovery to  
24 long-lasting symptoms<sup>1,2</sup>. The emergence of novel diseases such as COVID-19 presents the  
25 medical and scientific community with numerous challenges. Among them, defining the  
26 molecular mechanisms of disease related to specific outcomes is important to identify treatable  
27 traits and improve the performance of healthcare systems facing the challenges brought by the  
28 pandemic.

29  
30 Successfully reaching this precision medicine goal requires a more granular definition of the  
31 pathology. A symptom-based method to discover molecular mechanisms of the disease may  
32 result in a challenge emerging from the fact that the same higher-level phenomenon, such as  
33 COVID-19 severity, can be produced by several different molecular mechanisms, a phenomenon  
34 termed the «many-one» limitation<sup>3</sup>. Recent advances in computing strategies, such as machine  
35 learning, has enabled the development of methods that help overcome this limitation by starting  
36 from molecular profiles instead of symptoms to define endophenotypes, *i.e.* subgroups of  
37 individuals who are inapparent to traditional methods but share a common set of molecular  
38 factors that can lead to treatable traits<sup>4</sup>. Establishing successful treatment strategies requires a  
39 tailored approach to the underlying molecular mechanisms that can help predict and alter  
40 disease trajectories<sup>5</sup>. Endophenotypes can become apparent using extensive molecular

41 phenotyping combined with machine learning algorithms<sup>6-8</sup>. Current investigations of  
42 endophenotypes in COVID-19 have mainly relied on supervised approaches using fixed outcomes  
43 (such as disease severity) and integrating clinical variables at the onset<sup>9</sup>. We hypothesize that  
44 using an unsupervised approach exploiting a rich molecular dataset can provide novel  
45 mechanistic insights into the pathobiology of severe COVID-19 that can help physicians improve  
46 diagnosis and prognosis.

47  
48 Therefore, this study aims to identify endophenotypes linked to diverse clinical trajectories of  
49 COVID-19 using the extensive molecular phenotyping of a cohort of 731 SARS-CoV-2 positive  
50 hospitalized patients from the *Biobanque québécoise de la COVID-19* (BQC19,  
51 [www.quebecovidbiobank.ca](http://www.quebecovidbiobank.ca))<sup>10</sup>, a prospective observational cohort of SARS-CoV-2 positive and  
52 negative participants recruited in the province of Québec, Canada, to improve our understanding  
53 of COVID-19 pathobiology and our capacity to alter disease outcomes.

54  
55 In this manuscript, we report the identification of six endophenotypes in hospitalized SARS-CoV-  
56 2 positive participants to BQC19, associated with different clinical trajectories. The molecular  
57 information underpinning these endophenotypes were used to increase our understanding of  
58 pathobiology and predict the likelihood of patients admitted to the hospital to belong to each  
59 endophenotype using clinical blood workups.

60  
61  
62

## 63 Results

### 64 Unsupervised clustering of SARS-CoV-2-positive hospitalized BQC19 participants reveal 65 endophenotypes associated with varying disease severity

66 In this study, we aimed to identify endophenotypes of COVID-19 based on the circulating  
67 proteome of patients in our cohort of SARS-CoV-2 positive hospitalized participants to BQC19 (n  
68 = 1,362, Table 1), using an unsupervised approach. Figure S1 shows the distribution of the time  
69 of hospital admission of the patients and the corresponding waves as defined by National  
70 Institute of Public Health of Quebec (<https://www.inspq.qc.ca/covid-19>). For this purpose, we  
71 performed consensus agglomerative clustering of the subset of patients (n = 731, Table S1) for  
72 whom data corresponding to circulating proteome measured by a multiplex SOMAmer affinity  
73 array (Somalogic, ~5,000 aptamers)<sup>11</sup> was available in BQC19. The remaining samples were kept  
74 aside for follow-up analysis. First, the optimal number of clusters (k = 6) was identified using two  
75 criteria, Akaike's Information Criteria (AIC) and Bayesian Information Criteria (BIC) (Figure 1A);  
76 then, consensus agglomerative clustering (Euclidean distance and Ward linkage)<sup>12,13</sup> using  
77 bootstrap subsampling was performed to obtain six robust clusters (see Methods for details)  
78 (Figure 1, Figures S2 and S3).

79  
80 The clinical and pathological characteristics of patients in each endophenotype is provided in  
81 Table S1. To characterize the identified endophenotypes (EPs) with respect to disease severity,  
82 we performed two-sided Fisher's exact test to assess their enrichment (or depletion) in "severe"  
83 or "dead" outcome. EP6 was significantly enriched in the severe/dead outcomes (Benjamini-  
84 Hochberg false discovery rate (FDR) = 1.72E-18) with these outcomes observed in 66.1% of EP6

85 patients. Meanwhile, EP1 was significantly depleted in severe/dead outcomes (FDR = 8.23E-11)  
86 (Figure 2A, Table S1) with these outcomes only observed in 11.6% of EP1 patients. In addition,  
87 EP6 was enriched in participants 1) receiving oxygen therapy (FDR = 6.24E-12), 2) receiving  
88 ventilatory support (FDR = 6.63E-12), and 3) being admitted to intensive care unit (ICU) (FDR=  
89 1.26E-22) (Figure 2A, Table S1). Kaplan Meier analysis<sup>14</sup> also confirmed that the identified EPs  
90 have a distinct temporal pattern of admission to ICU (multivariate logrank test P = 5.06E-36), with  
91 EP1 (EP6) having the highest (lowest) chance of not being admitted to ICU (or die prior to that)  
92 in a 40-day span since their admission to the hospital (Figure 2B). A similar pattern can be  
93 observed when patients that died before admission to ICU were excluded (Figure S4, multivariate  
94 logrank test P = 6.55E-36). A two-sided Mann-Whitney U (MWU) test showed that patients in EP5  
95 were generally older than other EPs (FDR = 6.94E-5), while EP3 included younger patients (FDR =  
96 1.82E-4). However, EP6 (which had the most severe patients) did not show enrichment in older  
97 patients or individuals with high BMI (two-sided MWU FDR>0.05) (Figure 2C, Table S1).

98  
99 These analyses revealed that the unsupervised approach was able to identify endophenotypes  
100 with distinct disease characteristics and outcomes using the circulating proteome of the patients.  
101 We identified EP6 as a group of participants with an increase in many measures of COVID-19  
102 disease severity.

103

#### 104 **EP6 is enriched with BQC19's participants having acute respiratory distress syndromes**

105 In accordance with increase disease severity, EP6 was also enriched in COVID-19 medical  
106 complications (two-sided Fisher's exact test): acute respiratory distress syndrome (ARDS) (FDR =

107 1.43E-10), acute kidney injury (FDR = 6.37E-7), bacterial pneumonia (FDR=2.13E-6), liver  
108 dysfunction (FDR = 9.32E-3), and hyperglycemia (FDR = 1.56E-2) (Figure 3, Table S2). The  
109 frequency of ARDS was just below 8% in EP1 compared to greater than 44% in EP6, making this  
110 complication a key feature of this cluster (Figure 3, Table S2).

111

### 112 **EP6 is enriched in blood metabolites associated with severe COVID-19.**

113 To further characterize each EP and gain insight into mechanisms of disease, metabolomic  
114 profiling of plasma samples was done in parallel to the SOMAmer analysis. The results yielded  
115 data on 1,435 metabolites, of which 576 were found significantly altered in EP6 (two-sided MWU  
116 FDR < 0.01). Moreover, the metabolomic characterization of the plasma samples supported the  
117 distinction in blood composition at the levels of metabolomic sub-pathways and individual  
118 metabolites between the different EPs (Figure 4 and S3).

119

### 120 **Pathway enrichment analysis identifies FGFR-signaling in severe COVID-19 acute respiratory** 121 **distress syndrome**

122 To gain insight into the molecular mechanisms underlying the severity in EP6, we performed  
123 pathway enrichment analysis using the Knowledge Engine for Genomics (KnowEnG)<sup>6</sup> for the  
124 aptamers associated with EP6. Since aptamers were used to identify the EPs, it is expected that  
125 many of them would be significantly associated with the EPs. As a result, we selected a very strict  
126 threshold of FDR < 10E-20 (two-sided MWU test) to identify top aptamers associated with EP6  
127 (Table S4). We then used the gene set characterization pipeline of KnowEnG with Reactome<sup>15</sup>  
128 pathway collection. This analysis showed that while EP6 is characterized by pathways associated

129 with Interleukins and Cytokine Signaling in Immune system, multiple instances linked it with  
130 Fibroblast Growth Factor Receptor (FGFR) signaling, identifying this pathway as a potential driver  
131 of severe pathology that was not present in other EPs (Tables 2 and S4).

132

133 **SHC4 genotype and protein expression levels are associated with higher odds of belonging to**  
134 **EP6**

135 To further improve our understanding of the molecular mechanisms underlying EP6, we  
136 leveraged an additional dataset of Genome Wide association Study (GWAS) corresponding to  
137 these patients. We identified 25 single nucleotide variations (SNVs) distributed in 13 annotated  
138 genes, that were below a p-value threshold of  $1E-4$  differentiating EP6 versus the rest (Table 3).  
139 We then investigated each of the SNVs to which we could assign a gene and an aptamer, to assess  
140 whether their protein product in circulation was differentially regulated by the genotype (Table  
141 4). We discovered two genes, *SHC4* (encoding SHC adaptor protein 4) and *CACNA2D3* (encoding  
142 calcium voltage-gated channel auxiliary subunit alpha2 delta3) for which there was a significant  
143 association between genotype and protein expression levels (p-values  $< 0.05$ ). While *CACNA2D3*  
144 may have mild impact on EP6 membership (odd ratio = 0.61, Table 4), *SHC4* was one of the top-  
145 enriched aptamers (position 32 out of 4,985), with odds ratio of 11.98 and 2.00 for the protein  
146 product and SNV, respectively of belonging to EP6 for the alternative allele. Therefore, the GWAS  
147 analysis revealed that the signaling adaptor protein *SHC4* may play an important mechanistic role  
148 in contributing to severe disease pathology.

149

150 **A predictive model based on blood markers predicts EPs in a separate validation cohort**



151 To further characterize each EP, we assessed the clinical laboratory results obtained from blood  
152 draws and compared them between the groups. We focused on 21 markers that were measured  
153 in at least 50% of the patients used for consensus clustering (Figure 5A and Table S5) and used  
154 the summary value reported in the BQC19 database corresponding to the most extreme  
155 measurement among multiple blood draws (Table S5 provides this information for each blood  
156 marker). Figure 5A shows the elevation and depletion of these markers in the identified EPs. EP6  
157 is characterized by abnormal values in markers of inflammation (lymphopenia, total white blood  
158 cells count, neutrophilia, C-reactive protein (CRP)), liver damage (alanine aminotransferase (ALT),  
159 albumin, lactate dehydrogenase (LDH)), blood clotting disorder (D-dimers, low hemoglobin,  
160 International Normalized Ratio (INR) and hyperglycemia (glucose).

161  
162 To identify relationships that may shed light on factors influencing clinical laboratory results  
163 defining EP6, we also performed Spearman's rank correlation analyses between each blood test  
164 values and metabolites (Table S5).

165  
166 Since EPs and particularly EP6, which we identified as the EP with worst outcome, showed a clear  
167 and distinct clinical laboratory result signature compared to other EPs, we sought to develop a  
168 predictive model based on these signatures. Due to the large number of missing values for these  
169 markers in our cohort, we developed a nearest-centroid classifier that is capable of dealing with  
170 missing values and can predict EPs based on blood markers (see Methods for details). To test the  
171 ability of this model on prediction of EPs on an independent yet similar dataset, we used data  
172 corresponding to 631 SARS-CoV-2 positive hospitalized BQC19's participants that did not have

173 circulating proteome data and hence were not used to identify the endophenotypes. The clinical  
174 and pathological characteristics of patients in each predicted endophenotype (PEP) is provided  
175 in Figure 5B-5E and Table S6.

176  
177 Our predictive model identified 116 of these patients to belong to EP6. Fisher's exact test showed  
178 a significant enrichment of the predicted EP6 (PEP6) in severity/dead (FDR = 1.77E-22), while  
179 PEP1 and PEP2 were significantly depleted in these outcomes (FDR = 1.61E-4 and FDR = 1.30E-8,  
180 respectively), as shown in Figure 5B and Table S6. Similar to EP6, PEP6 was also significantly  
181 enriched in participants 1) receiving oxygen therapy (FDR = 2.38E-8), 2) receiving ventilatory  
182 support (FDR = 4.40E-8), and 3) being admitted to ICU (FDR = 1.23E-24) (Table S6). Kaplan Meier  
183 analysis also confirmed that these PEPs have a distinct temporal pattern of admission to ICU  
184 (multivariate logrank test  $P = 1.05E-34$ ), with PEP6 having the lowest chance of not being  
185 admitted to ICU (or die prior to that) in a 40-day span since their admission to the hospital (Figure  
186 5E).

187  
188 These results suggest that our predictive model can use these 21 blood markers to generalize the  
189 definition of endophenotypes to patients for whom the proteome data is unavailable.

190

## 191 **Discussion**

192 The results presented herein came from a large cohort of deeply phenotyped SARS-CoV-2  
193 positive hospitalized participants, combined with unsupervised clustering that provided both  
194 expected and novel findings into the molecular mechanisms regulating COVID-19 outcomes.

195 They led to the identification of an endophenotype (EP6) associated with worst clinical outcome  
196 of COVID-19 (enriched in acute respiratory distress syndrome) reflected by a greater proportion  
197 of ICU admission, mechanical ventilation, and severe/death outcomes (Figure 1). Clinical features  
198 of this endophenotype were consistent with published literature with increased levels of CRP, D-  
199 dimers, elevated neutrophils, and depleted lymphocytes (Figure 5A, Table S5). Our approach  
200 enabled the identification of interleukins, FGFR and SHC4 signaling as cardinal features of the  
201 molecular pathways associated with severe COVID-19. Importantly, this information was  
202 sufficient to train an accurate predictive model that could in the future support clinical care.

203

204 *The approach: unsupervised clustering capacity at identifying clinically meaningful*  
205 *subpopulations*

206 Our unsupervised clustering approach in conjunction with a rich molecular dataset enabled us to  
207 identify endophenotypes that could not be captured using traditional methods classifying the  
208 population in two bins solely based on severity. This is in part because of the «many-one»  
209 limitation: the same higher-level phenomenon (COVID-19 severity) can be produced by several  
210 different molecular mechanisms. Determining endophenotypes using an unsupervised method  
211 provides a higher granularity and increases the chance to identify distinct molecular mechanisms  
212 and pathways resulting in similar COVID-19 severity. Accordingly, we identified two  
213 endophenotypes with more favorable outcomes (EP1 and EP2), three endophenotypes with  
214 intermediate outcomes in terms of severity (EP3, EP4 and EP5) and one endophenotype which  
215 led to worst outcomes compared to all others (EP6).

216

217 The identification of endophenotypes was done systematically using robust consensus clustering  
218 of aptamer expression levels in which the optimum number of clusters was determined  
219 congruently using two well-established measures: AIC and BIC. The consensus clustering using  
220 bootstrap sampling (1000 times) ensured identification of robust clusters that are not sensitive  
221 to exclusion of some of the samples (20% randomly selected and excluded at each cycle).  
222 Moreover, identifying the best number of clusters using AIC/BIC (both of which agreed with each  
223 other) allowed us to reveal the patterns of the EPs directly from the data, instead of imposing a  
224 pattern onto it through human supervision. This is an important strength of the study that  
225 enabled us to identify distinct molecular patterns of patients that could have remained  
226 undetected using other traditional approaches.

227  
228 Moreover, to improve the translational applicability of EPs, we developed a predictive model  
229 based only on laboratory measured blood markers to generalize the definition of these  
230 endophenotypes to unseen samples without measured aptamer expression levels.  
231 Characteristics of EPs predicted solely based on their blood markers were consistent with the  
232 original EPs, suggesting the use of blood markers as surrogates for generalizing these EPs to new  
233 patients and automating identification of high-risk groups in the clinic.

234  
235 *COVID-19 molecular pathology*

236 The datasets used in this study carry rich molecular information on mechanisms of disease. SARS-  
237 CoV-2 infection has been shown to be associated with altered kynurenin levels associated with  
238 increase IL-6 and kidney injury<sup>16</sup>. Interestingly, we also observed Kynurenin to be enriched in EP6

239 but depleted in EP1, supporting the association of increase kynurenin with COVID-19 severity and  
240 the enrichment in acute kidney injury complication.

241  
242 Spermidine/spermine N(1)-acetyltransferase (SSAT) contributes to polyamine synthesis. In  
243 addition, its extracellular metabolite, N1,N12-diacetylspermine, is one of the top 15 metabolites  
244 enriched in EP6 (Figure 4A), is positively correlated with Urea and creatinine, and is negatively  
245 correlated with lymphocyte numbers (Table S5). Deletion of SSAT in mice is protective against  
246 LPS-induced kidney injury<sup>17</sup>. SSAT activity is associated with white blood cell count in Acute  
247 Myeloid Leukemia and Chronic Myeloid Leukemia patients<sup>18</sup>. This suggest that the tryptophan  
248 and polyamine metabolisms are associated with acute kidney injury in COVID-19 and identifies  
249 potential pathways of disease progression.

250

#### 251 *COVID-19 ARDS*

252 EP6 is characterized by its enrichment in ARDS (44% vs 8% in EP1, Figure 3). Low levels of  
253 Sphingosine 1-phosphate (S1P) are associated with ARDS and were shown to be associated with  
254 greater ICU admission and decrease survival in COVID-19<sup>19</sup>. Accordingly, we found that S1P levels  
255 are depleted in EP6 while they are enriched in EP1 (Figure 4A). Interestingly, the aptamers  
256 detecting neutral ceramidase, an enzyme converting ceramides into sphingosine, is enriched in  
257 EP1 (although changes in protein abundance as detected by aptamers may not necessarily reflect  
258 changes in enzymatic activity). Accordingly, dihydroceramides and ceramides are depleted in  
259 cluster EP1. Conversely, dihydroceramides and ceramides are significantly enriched in EP6,  
260 suggesting that there is a shunting of the pathway away from sphingosine towards more pro-

261 inflammatory ceramides in EP6 associated with metabolic disorders<sup>20</sup>. Moreover, one of the top  
262 aptamers found enriched in EP6, is the enzyme Serine palmitoyltransferase 2 (SPTLC2) (Table  
263 S4)<sup>21,22,23</sup>. These results suggest a counterbalance between ceramides and sphingosine, where  
264 the former is associated with poorer outcomes during critical illness, whereas higher levels of the  
265 latter has more favorable outcomes in ARDS.

266

267 *Metabolomic profile of EP6 supports a role for immuno-thrombosis-mediated organ damage in*  
268 *COVID-19*

269 To obtain a more comprehensive understanding of the alteration in metabolic profiles in EP6, we  
270 investigated which metabolic subpathways were significantly enriched in EP6 (Figure 4, Table S3).  
271 The two top pathways (FDR < 1E-2) are “Methionine, Cysteine, SAM and Taurine Metabolism”  
272 and “phosphatidylethanolamine (PE)”. Interestingly, these two pathways are known to  
273 interact<sup>23</sup>, with PE methylation a major consumer of S-Adenosylmethionine (SAM) leading to the  
274 synthesis of S-Adenosylhomocysteine (SAH) and cystathionine<sup>24</sup>, which itself has been found  
275 upstream of 2-hydroxybutyrate and 2-aminobutyrate in a model of hepatotoxicity<sup>25</sup>. SAH,  
276 cystathionine, 2-hydroxybutyrate and 2-aminobutyrate are significantly enriched in EP6.  
277 Congruently, EP6 is enriched (FDR < 1E-2) in liver dysfunction (Figure 3, Table S2), with markers  
278 of liver dysfunction all significantly altered in clinical blood works: ALT, albumin, bilirubin and LDH  
279 (Figure 5A, Table S5).

280

281 PEs become exposed at the surface of cell membranes upon exposure to stress, inflammation,  
282 and cell death<sup>26,27</sup>. In a Syrian hamster model, infection with SARS-CoV-2 had markedly increased

283 PE expression in the animals that were fed a high salt, high fat diet, demonstrating the interaction  
284 between infection and metabolic disorder with the abundance of circulating PE<sup>28</sup>. Phospholipids-  
285 containing microparticles from platelet activation contribute to Tissue Factor activation and pro-  
286 thrombinase activity<sup>29</sup>. Platelets-derived microparticles have a much greater procoagulant  
287 activity than activated platelets<sup>30</sup>. Exposure of glycerophospholipids in conjunction with  
288 phosphatidylserine (PS) enhances factor X activation and increases pro-thrombinase  
289 activities<sup>31,32</sup>. Interestingly, red blood cells exposed to paclitaxel, PS were exposed to the surface  
290 by protein kinase C (PKC) zeta activation of scramblase<sup>33</sup>. The aptamer detecting PKC zeta is one  
291 of the top aptamers associated with EP6 (Table S4). PKC zeta can be activated by testosterone,  
292 Dehydroepiandrosterone(DHEA)<sup>34</sup> and dexamethasone<sup>35</sup>, signals of relevance to EP6. The  
293 membranes of azurophilic granules, which contains Cathepsin G representing the most enriched  
294 aptamer in EP6, are enriched in PE relative to PC<sup>36</sup>. Accordingly, EP6 in addition to significantly  
295 enhanced PE abundance, showed decrease platelets count, increased D-Dimers, INR and  
296 activated partial thromboplastin time (APTT) (Figure 5A, Table S5), hallmarks of Disseminated  
297 Intravascular Coagulation (DIC), a serious and often lethal complication of sepsis<sup>37</sup>. Liver lesions  
298 are frequently observed in DIC<sup>38</sup>, where liver damage can cause DIC, or exacerbate its  
299 manifestation due to its function in clearing activated products of the coagulation cascade. Taken  
300 together, the metabolomic profile of EP6 supports pro-coagulation activity in circulation that can  
301 be linked to organ damage.

302

303 Many early reports suggested a role for immunothrombosis involving neutrophil-mediated  
304 release of NETs contributing to endothelial dysfunction as a mechanism of microthrombosis in

305 COVID-19 associated ARDS<sup>39-41</sup>. These findings have been supported by several studies carried  
306 out in humans<sup>42-50</sup>. All of these studies were performed with 7 to 77 participants. Our study  
307 supports these findings in two important ways: 1) we used a much greater sample size (n = 731)  
308 and, 2) the identification of molecular factors associated with immuno-thrombosis emerged from  
309 an *unsupervised* analysis of deep phenotyping of the participant population. The strength of the  
310 extensive characterization performed in this study has enabled the finer definition of molecular  
311 mechanisms of disease by providing associations between the circulating proteome,  
312 metabolome and clinical laboratories results.

313

#### 314 *FGFR and SHC4 intracellular signaling in COVID-19 ARDS*

315 Two of the outstanding novel molecular factors identified by our study associated with COVID-  
316 19 ARDS are FGFR and SHC4. Circulating levels of the pro-angiogenic FGF-2 has been associated  
317 with COVID-19 severity and creatine levels in a study of 208 SARS-CoV-2 positive participants<sup>51</sup>.  
318 It is noteworthy that the use of Nintedanib, an inhibitor of FGFR, Vascular Endothelial Growth  
319 Factor Receptor (VEGFR) and Platelet-Derived Growth Factor Receptor (PDGF-R) approved for  
320 use in interstitial lung disease, improved pulmonary inflammation and helped wean off  
321 mechanical ventilation of three middle-aged obese COVID-19 patients where lung function  
322 restoration has been challenging<sup>52</sup>. While the adaptor protein SHC4 has not been experimentally  
323 demonstrated to modulate FGFR signaling, a 12-gene biomarker signature associated with  
324 melanoma contains FGFR2, FGFR3 and SHC4<sup>53</sup>. In view of the limited knowledge of this  
325 understudied member of the SHC family, it is attractive to speculate that it may act downstream  
326 of FGFR or other associated growth factor receptors linked to angiogenesis, favoring



327 immunothrombosis associated with COVID-19 ARDS. Additional experimentation is required to  
328 establish a sound scientific basis for these hypotheses. Moreover, the identity of the cells  
329 expressing SHC4, leading to its presence in the circulation is not known, also the focus of ongoing  
330 investigations. Taken together, our identification of FGFR and SHC4 signaling pathways  
331 distinguishing EP6 from other endophenotypes, supports further investigation of antagonists of  
332 those pathways to treat severe lung manifestations of COVID-19 and their potential use as  
333 biomarkers of severe disease activity.

334

### 335 *Limitations and considerations*

336 The data presented in this study come from individuals participating to BQC19, a prospective  
337 observational cohort built to study COVID-19 in Québec (Canada) with its specific population  
338 profile as reported previously<sup>10</sup>. While the number of participants was sufficient to establish the  
339 endophenotypes using the extensive proteomic profile available in BQC19, it was insufficient for  
340 traditional genome-wide association study (GWAS) to identify relations between SNVs and the  
341 identified endophenotypes<sup>54</sup>. Instead, we exploited the top SNVs that distinguished EP6 from  
342 other EPs in a pQTL analysis. Because these results show a potential genetic functional causality,  
343 it gives us the confidence that these associations are likely not due to random chance; however,  
344 the robustness of this approach needs to be further tested in other studies. A chronological bias  
345 may also be present, as most of the participants used for endophenotyping in this study were  
346 recruited during the first two waves of the pandemic (Figure S1), prior to widespread vaccination  
347 in Québec and prior to the appearance of the Omicron variant and sub-variants. Therefore, some  
348 of the features of the identified endophenotypes may change over the course of the pandemic.

349 It will be essential to continue to assess the molecular profiles longitudinally to better understand  
350 the dynamic nature of host-pathogen interactions. It will also be interesting to compare the  
351 profiles of COVID-19 ARDS to other viral-induced ARDS, to identify commonalities as well as  
352 distinguishing features.

353

354 In this study, we used circulating proteome as determined by aptamers to identify  
355 endophenotypes, a task for which it is well suited as it can capture a dynamic landscape.  
356 However, several important considerations need to be mentioned. First, raw (unnormalized)  
357 expression values of the same aptamer can be used to compare different samples, but these  
358 values cannot be used to compare different aptamers against each other in the same sample,  
359 since they only show the relative abundance of expression and not absolute expression. As such,  
360 one needs to first normalize these values across samples (one aptamer at a time) and then  
361 subject them to follow-up analysis such as clustering, an approach that we adopted in this study.  
362 Second, since information only shows relative abundance, focusing on an individual aptamer and  
363 analyzing it will require additional measurements to establish absolute abundance. Moreover, if  
364 one wants to analyze aptamers individually (instead of the collective approach that we used in  
365 this study), they need to consider the effect of complexes and non-specific binding that may  
366 result in noisy data. As such, we suggest that the aptamer expression data be used collectively  
367 and after proper normalization, which enabled us to identify various EPs and important molecular  
368 mechanisms discussed in this study.

369

370 In this work, we developed a predictive model based on blood markers that enables us to  
371 generalize the definition of EPs to scenarios where data on circulating proteome is not available.  
372 This significantly increases the applicability of this approach and may enable automating  
373 identification of high-risk individuals in the clinic. However, time and follow-up studies are  
374 required to move this predictive model and the definitions of EPs from research to clinic and  
375 develop it as an acceptable clinical practice. Nonetheless, our approach can be used to study  
376 COVID-19 in different cohorts and identify characteristics that can guide the treatment of the  
377 disease.

378

#### 379 *Future directions*

380 There is enormous amount of data within this study and BQC19 that can and should be exploited  
381 by the scientific and medical community to improve our understating of COVID-19 and novel  
382 emerging acute respiratory illnesses. Analyzing in more details the molecular profiles of the other  
383 EPs, in particular EP3-5, which lead to similar outcomes from distinct molecular pathways should  
384 further yield important insights into mechanisms of the disease. For example, EP5 is enriched in  
385 males and cardiovascular disease complications, while EP4 is enriched in female (like EP1) but  
386 with different distinct clinical trajectories pointing to sex-dependent and independent molecular  
387 mechanisms of disease.

388

#### 389 **Conclusion**

390 The major strength of this study is its starting point: unsupervised analysis of a large and deeply  
391 phenotyped cohort. We showed that this approach can address both fundamental scientific

392 questions pertaining to mechanisms of disease and help the medical community improve patient  
393 outcomes through early identification of patient that may follow a severe clinical course during  
394 COVID-19.

395

## 396 **Methods:**

### 397 **Datasets and preprocessing**

398 The Biobanque québécoise de la COVID-19 (BQC19; [www.quebecovidbiobank.ca](http://www.quebecovidbiobank.ca)) is aimed at  
399 coordinating the collection of patients' data and samples for COVID-19 related research. Data  
400 and samples were collected from ten sites across the province of Québec (Canada)<sup>10</sup>. BQC19  
401 organizes the collected data, including clinical information and multi-omics experimental data,  
402 before making it available in successive releases. For this study, we used release #5 of the clinical  
403 data published in December 2021, the circulating proteome determined using SOMAmers<sup>54</sup> and  
404 Metabolomics data<sup>55</sup>. BQC19 GWAS imputation data was generated by Tomoko Nakanishi at  
405 Brent Richards lab, Jewish General Hospital and McGill University. Detailed codes used for  
406 generating the data can be found in: [https://github.com/richardslab/BQC19\\_genotype\\_pipeline](https://github.com/richardslab/BQC19_genotype_pipeline)  
407

408 Our main corpus of analysis consisted of  $n = 1,362$  hospitalized and SARS-CoV-2 positive patients  
409 (based on qRT-PCR) of BQC19. This included  $n = 731$  patients for which both clinical and  
410 proteomic data were available as well as  $n = 631$  patients for which proteomic data was not  
411 available, but their clinical data contained measurements for more than half (at least 11 out of  
412 21) of the blood markers that we used as a validation set for the predictive model developed in  
413 this study.

414

415 We also obtained data (n = 731) corresponding to the circulating proteome measured between  
416 April 2, 2020 and April 20, 2021 by a multiplex SOMAmer affinity array (Somalogic, 4,985  
417 aptamers) from BQC19 (release #3 Sep. 2021, associated patients' data updated in release #5  
418 Dec. 2021). When measurements of the same patients but at different time points were  
419 available, we used the one corresponding to the first time point. SomaScan is a biotechnological  
420 protocol commercialized by the Somalogic company. It relies on a set of artificial aptamers linked  
421 to a fluorophore and each designed to bind a single protein. Once added to the sample, the  
422 activity of each aptamer is measured through fluorescence and used to approximate the  
423 expression level of the targeted protein. SomaScan protocol comprises several levels of  
424 calibration and normalization to correct technical biases<sup>11</sup>. Log<sub>2</sub> and Z-score normalization were  
425 performed on each aptamer separately in addition to the manufacturer's provided normalized  
426 data (hybridization control normalization, intraplate median signal normalization, and median  
427 signal normalization). Since the data was analyzed by Somalogic in two separate batches, we  
428 applied the z-score transformation separately to each batch, to reduce batch effects. These  
429 additional transformations ensure that the measured values of different aptamers are  
430 comparable and can be used in cluster analysis.

431

432 We obtained metabolomic data (1,435 metabolites) from BQC19. We used the batch-normalized,  
433 missing values imputed and log-transformed version of the data.

434

435 **Analyses of the GWAS dataset**

436 For the GWAS analyses, annotation of SNVs were done using the biomaRt package<sup>56</sup> from R<sup>57</sup> and  
437 all analyses were done using R version 4.1.3. Quality control steps were derived in majority from  
438 a 2017 QC tutorial article<sup>58</sup>. At the beginning, we had 867,450 markers and 2,429 samples. We  
439 import Plink format data into R using the “read\_plink” function from genio package<sup>59</sup> from R. We  
440 removed 103,592 non ACGT bi-allelic markers. We calculated the predicted sex by looking at the  
441 rate of homozygote markers on chromosome 23. We removed 3,588 markers with call rates <  
442 98%, 448,932 monomorphic markers and markers with MAF <0.05, and 28,092 markers with  
443 Hardy Weinberg equilibrium < 1E-6 (calculated by the “HWE.exact” function from the genetics  
444 package<sup>60</sup> from R. For the EP6 cluster group analyses, we removed in addition 1,747 samples that  
445 were not in the cluster analysis, 8 samples with a sex discrepancy (based on predicted sex  
446 calculated earlier and reported sex), and 3 samples with a heterozygosity rate > 3 standard  
447 deviations. We finally removed a pair of samples who had approximately the same genome  
448 probably due to an error of manipulation. We couldn’t know which one was the right sample, so  
449 we removed both of them. We also had 2 pairs of individuals who had a pi-hat of ~0.5 (meaning  
450 first degree relatives), we decided to keep one sample per pair, the one with the higher call rate.  
451 All other pairs of individuals had a pi-hat < 0.21 that is judge acceptable considering our  
452 population. Pi-hat were calculated with the “snpGdsIBDMoM” function from SNPRelate  
453 package<sup>61</sup> from R. At the end of quality controls, 283,246 markers on 655 samples have been  
454 used to perform association analyses.

455

456 To perform the principal component analyses (PCA), we took a subsample of independent  
457 markers (pruning) with a maximum sliding window of 500,000 base pairs and a linkage

458 disequilibrium (LD) threshold of 0.2 using the “snpGdsLDpruning” function from the SNPRelate  
459 package from R. We ran the PCA with the “snpGdsPCA” function from SNPRelate package from  
460 R. The first 2 principal components (PCs) were considered significant.

461  
462 For the GWAS analyses of the 283,246 remaining markers between EP6 cluster compared to all  
463 others, we modeled a logistic regression with the dichotomous variable indicating if the  
464 participants belong to the EP6 cluster as the outcome variable. We used the additive model for  
465 markers as an independent variable and we adjusted the models with the first two PCs. Odds  
466 ratio and p-values were calculated on each model. QQ-plots have been performed as quality  
467 control of the models; p-values were plotted using “qqplot.pvalues” function from gaston  
468 package<sup>62</sup> from R (data not shown). We compared the aptamers’ normalized level of expression  
469 (based on normalization described earlier) between the three groups of genotypes for each  
470 studied genes by performing standard ANOVA analyses followed by Tukey *post hoc* tests  
471 (referred to in this study as pQTL analysis). Since aptamers tested are limited compared to the  
472 SNVs, we have fixed significance p-values threshold below 1E-4 to report more SNVs instead of  
473 the more common 1E-5 suggestive threshold. Finally, to identify if the cluster EP6 may be  
474 explained by the aptamers and the SNVs, we performed multiple logistic regression analyses  
475 models include aptamers expression values, SNV genotypes (additive model) and the two  
476 principal components. OR are reported with 95% confidence intervals.

477

478 **Consensus agglomerative clustering**

479 Patients were clustered using agglomerative clustering, with Euclidean distance and Ward's  
480 linkage<sup>12,13</sup>. To identify number of clusters  $k$ , we used the elbow method based on the Akaike  
481 Information Criterion (AIC) and Bayesian Information Criterion (BIC). More specifically, we  
482 calculated the AIC and BIC for clustering using  $k = 2, 3, \dots, 20$  and used the Kneedle algorithm<sup>63</sup> to  
483 identify the value of  $k$  corresponding to the “elbow”, where increasing the value of  $k$  does not  
484 provide much better modeling of the data. Kneedle identified  $k = 6$  as the number of clusters  
485 based on both AIC and BIC (Figure 1A).

486  
487 Given the number of clusters in the data, we then used consensus clustering with sub-sampling  
488 to obtain robust endophenotypes. We randomly sampled 80% of the patients 1000 times. Each  
489 time, we used agglomerative clustering above with  $k = 6$  to identify clusters. Given these 1000  
490 clusterings, we calculated the frequency of two patients appearing in the same cluster, when  
491 both were present in the randomly formed dataset. We then performed one final agglomerative  
492 clustering of these frequency scores to identify the six endophenotypes (Figure S2A and Figure  
493 1B). The distribution of Rand-Index, showing the concordance between each one of the 1000  
494 clusterings and the final consensus clustering is provided in Figure S2B (mean Rand-Index =  
495 0.823), reflecting a high degree of consistency.

496

#### 497 **Metabolomic pathway characterization of EP6**

498 The 1435 metabolites measured were organized into 122 sub-pathways in the original dataset  
499 (denoted as “SUB\_PATHWAYS”). We first identified metabolites whose values were significantly  
500 higher or lower in EP6 compared to other EPs (two-sided MWU test,  $FDR < 0.01$ ). Then, we used



501 these metabolites to perform pathway enrichment analysis (one-sided Fisher's exact test) based  
502 on 122 pathways. The resulting p-values (Table S3) were then corrected for multiple tests using  
503 Benjamini-Hochberg FDR.

504

#### 505 **Nearest-centroid predictor based on blood markers**

506 In order to predict endophenotypes from blood tests, we developed a missing-value resilient  
507 nearest-centroid classifier. We used the set of patients that were used to form the original EPs  
508 (n = 731) as the training set and the set of patients that did not have proteome data as the  
509 validation set (n = 631). First, we z-score normalized each blood marker across all the patients in  
510 the training set, one marker at a time. We then formed a blood marker signature (a vector of  
511 length 21) for each EP. Each element of an EP's signature corresponds to the mean of the  
512 corresponding marker across all patients of that EP.

513

514 To predict the EP label of each patient in the test set, we first z-score normalized their blood  
515 marker measurements using the mean and standard deviation of the blood markers calculated  
516 from the training set. Then, we calculated the cosine distance between each test patient's blood  
517 marker profile and the centroids (excluding missing values) and identified the nearest EP as the  
518 predicted EP (PEP) label of the patient.

519

#### 520 **Acknowledgements**

521 This work was made possible through open sharing of data and samples from the Biobanque  
522 québécoise de la COVID-19, funded by the Fonds de recherche du Québec - Santé, Génome

523 Québec, the Public Health Agency of Canada and, as of March 2022, the Ministère de la Santé et  
524 des Services Sociaux du Québec. We thank all participants to BQC19 for their contribution. This  
525 study was supported by the Fonds de recherche du Québec - Santé (FRQS)- Cardiometabolic  
526 Health, Diabetes and Obesity Research Network (CMDO)- Initiative. This work was also supported  
527 by Natural Sciences and Engineering Research Council of Canada (NSERC) grant RGPIN-2019-  
528 04460 (AE).

529

### 530 **Permissions**

531 The study was approved by the Institutional Ethics Review Board of the “Centre intégré  
532 universitaire de santé et de services sociaux du Saguenay-Lac-Saint-Jean” (CIUSSS-SLSJ) affiliated  
533 to Université de Sherbrooke [protocol #2021-369, 2021-014 CMDO – COVID19].

534 **Figures**

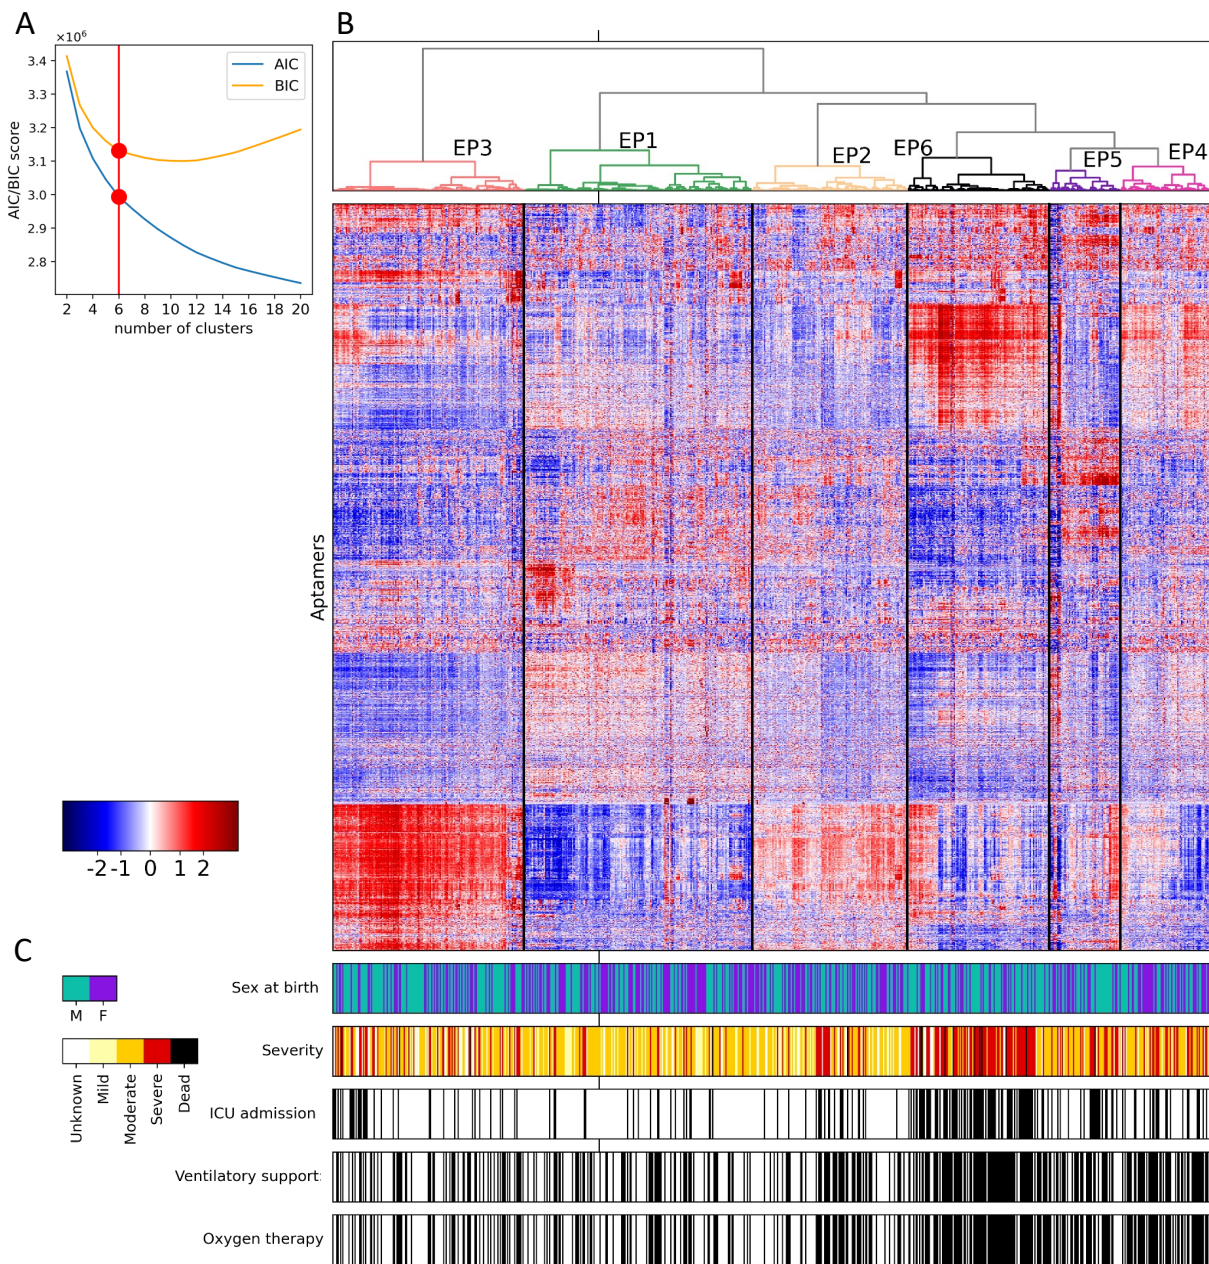

535

536 **Figure 1:** Unsupervised consensus clustering of SARS-CoV-2 positive patients.  
537 A) The elbow points (circles in red) of Akaike's Information Criteria (AIC) and Bayesian  
538 Information Criteria (BIC) curves versus number of clusters consistently corresponded to  $k=6$  as  
539 the optimal number of clusters. B) The heatmap shows the expression of aptamers (rows) in each  
540 sample (columns). The dendrogram shows the identified endophenotypes. C) Characterization of  
541 samples based on sex at birth, highest world health organization (WHO) severity level achieved,  
542 intensive care unit (ICU) admission, ventilatory support, and oxygen therapy. For the last three  
543 rows, a sample colored "black" reflects a label of "yes".

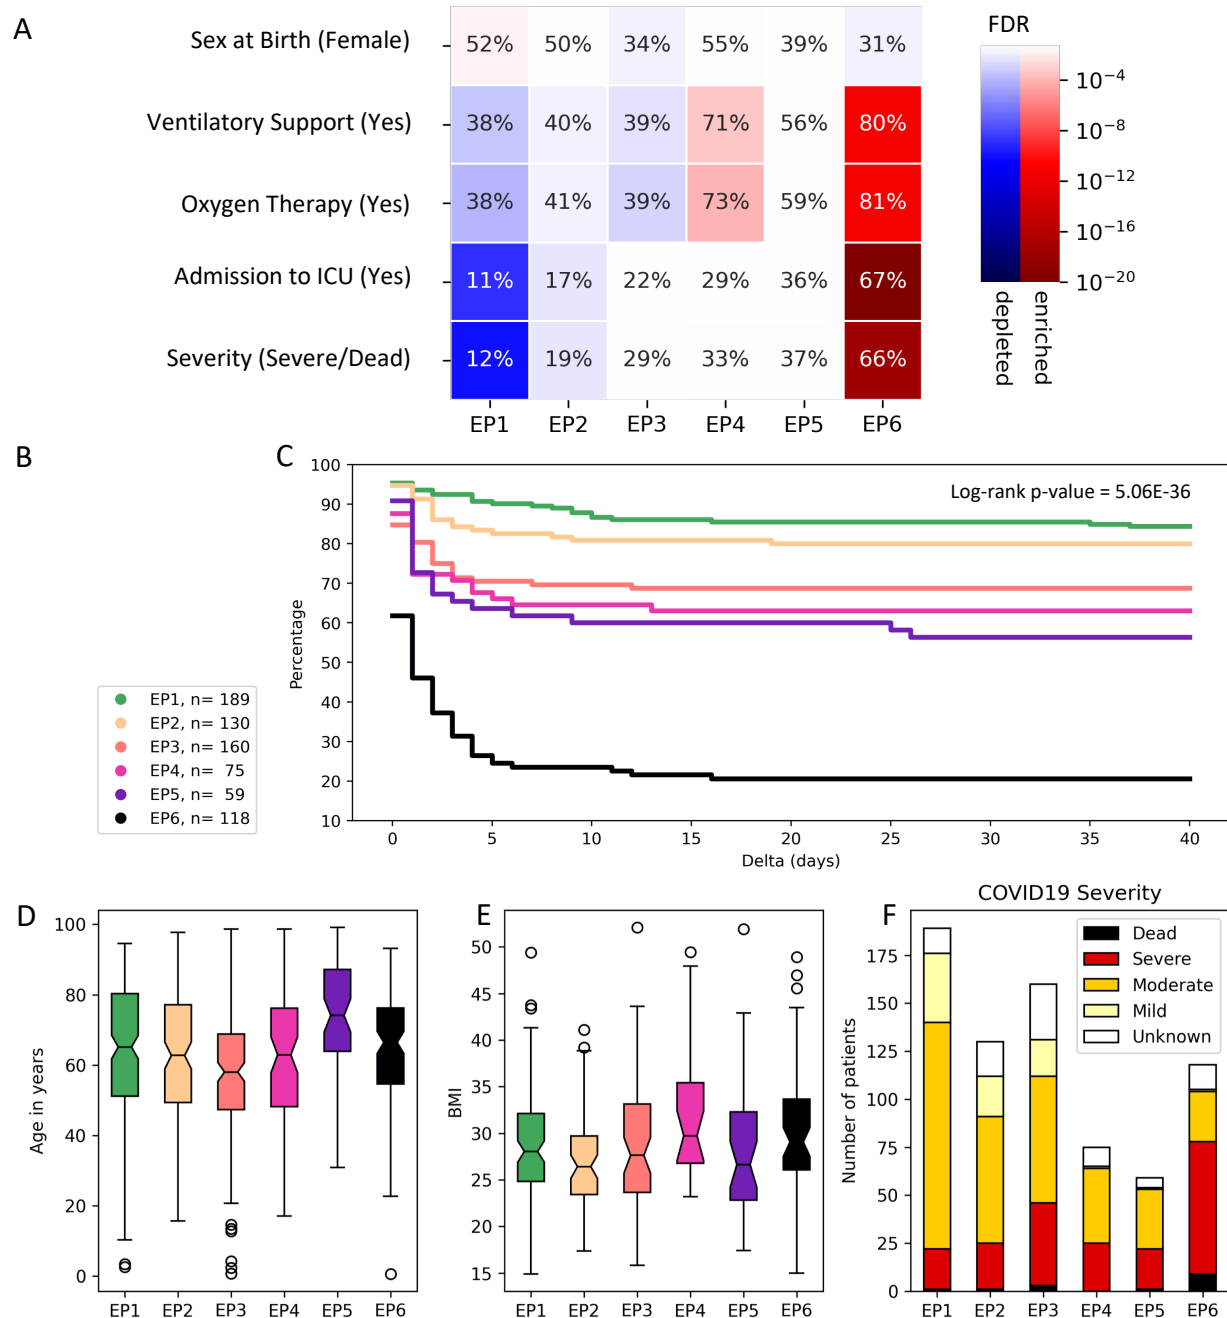

544

545 **Figure 2:** Characterization of endophenotypes (EPs).

546 A) Enrichment or depletion of each EP in clinical variables (one cluster versus rest). Two-sided  
 547 Fisher's exact tests are used to calculate the p-values, which are corrected for multiple tests using  
 548 Benjamini-Hochberg false discovery rate (FDR). Gradients of blue show depletion, while gradients  
 549 of red show enrichment. FDR values above 0.05 are depicted as white. B) The number of patients  
 550 in each EP and the colors used to represent them in panels C, D, and E. C) Kaplan-Meier analysis  
 551 of the time between patients' admission to the hospital and their admission to intensive care unit  
 552 (ICU) (or death if earlier) for each EP (Delta). D) Distribution of age in each EP. E) Distribution of  
 553 BMI in each EP. F) COVID-19 severity in each EP.

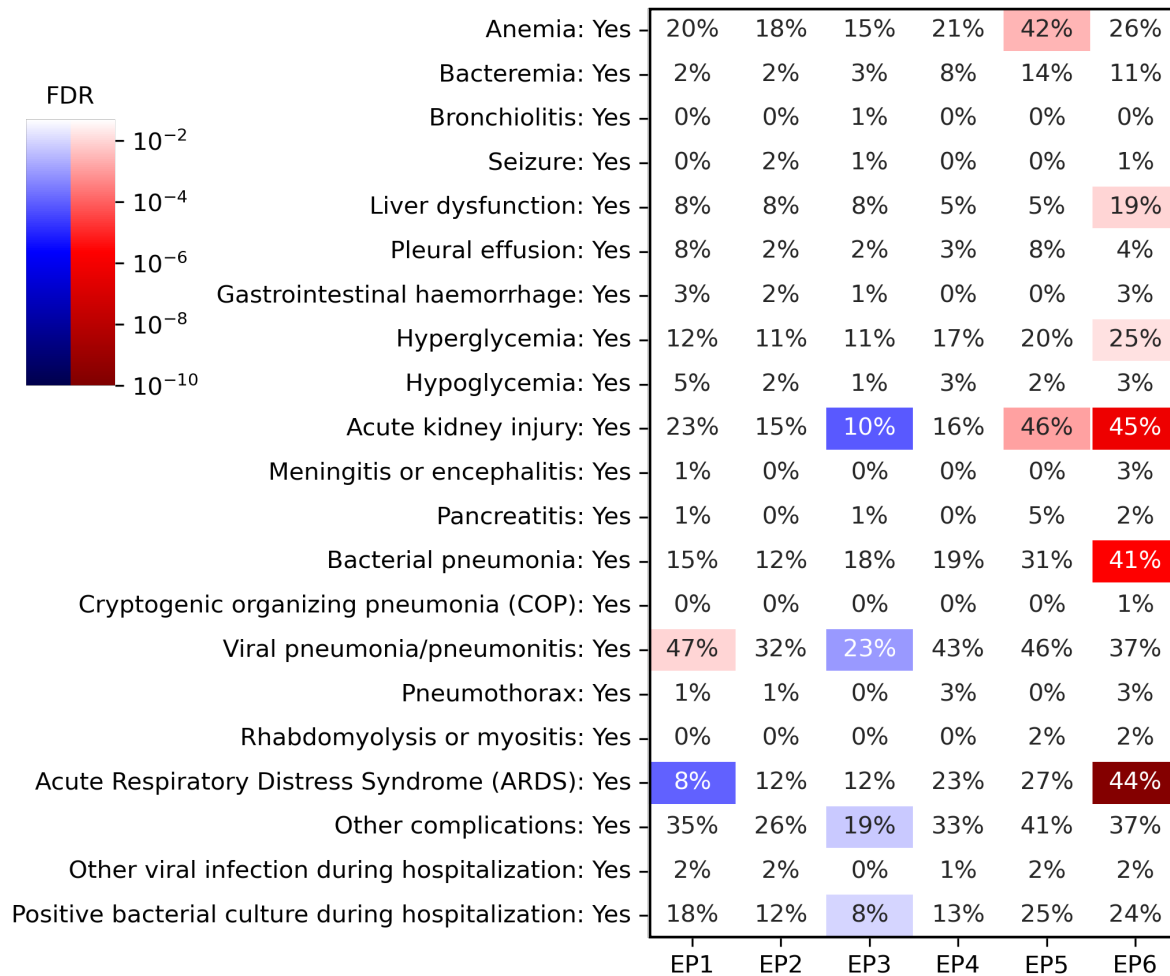

554  
 555 **Figure 3:** Frequency and significance of complications in different EPs.  
 556 The value in each cell shows the percentage of patients of that EP (column) that suffered from  
 557 the complication (row). The colors represent two-sided Fisher's exact test false discovery rate  
 558 (FDR, corrected for multiple tests). Red represents enrichment, while blue represents depletion.  
 559 FDR values below 0.05 are shown as white.

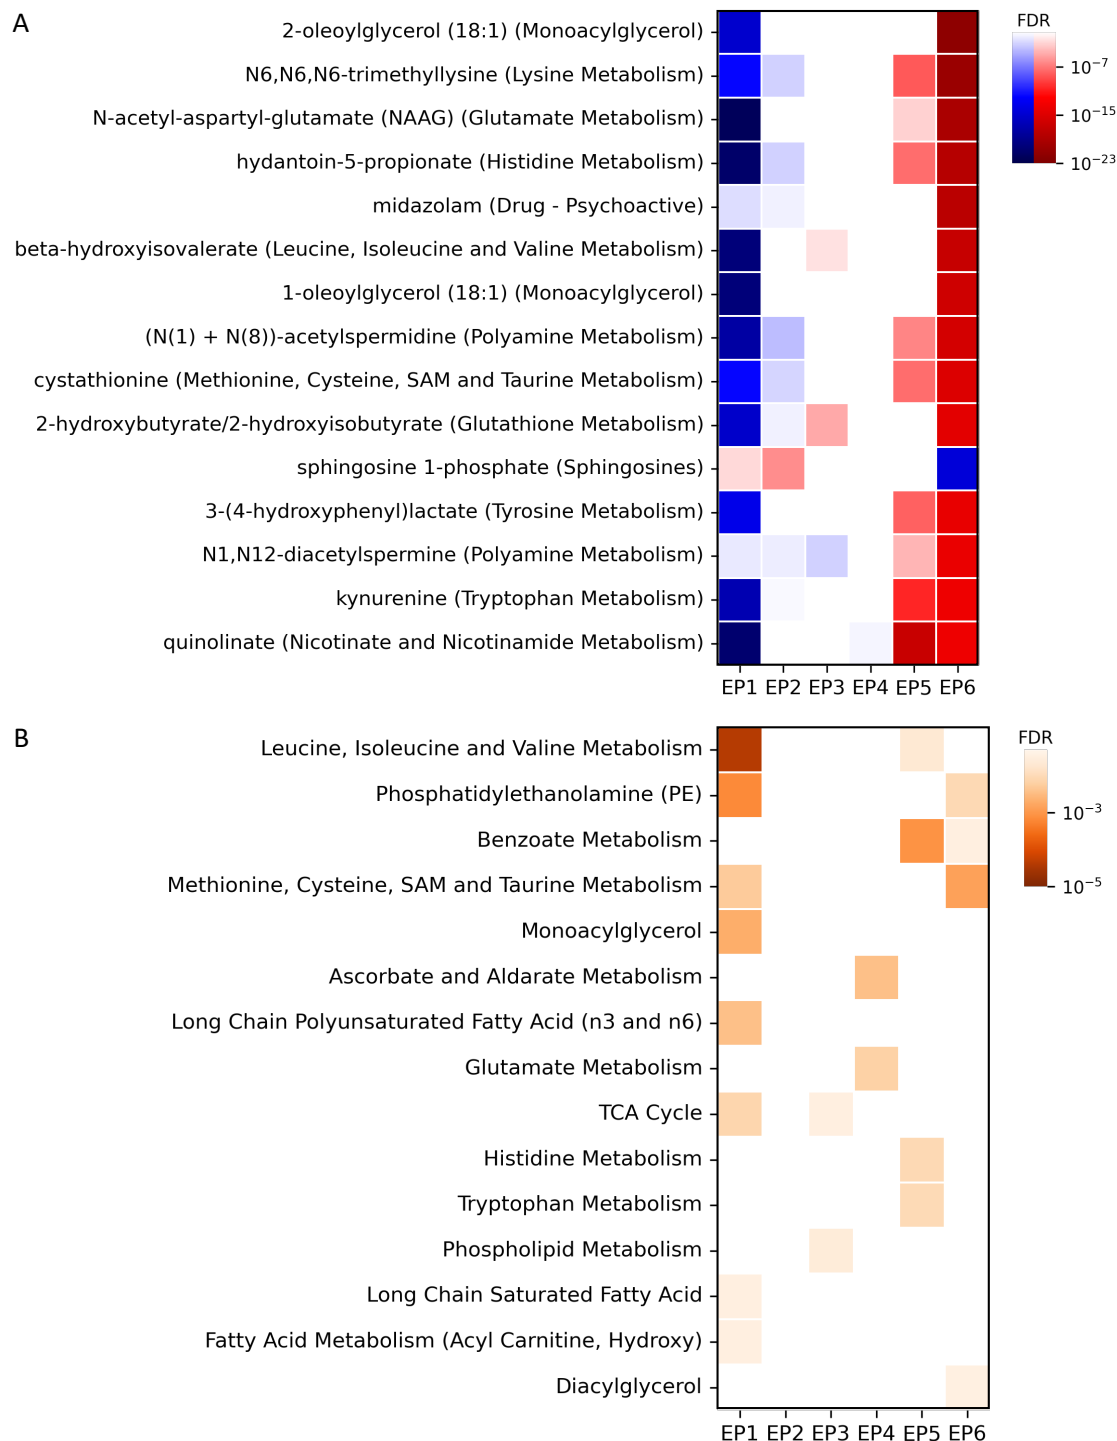

560  
561  
562  
563  
564  
565  
566  
567

**Figure 4: Metabolite characteristics of endophenotypes (EPs).**

A) The heatmap shows the over-expression (red) and under-expression (blue) of metabolites in different EPs (two-sided Mann–Whitney U test). Row names show metabolites followed by the sub-pathway to which they belong in parentheses. Only top 15 metabolites (based on false discovery rate for EP6) for which a definite name and sub-pathway was available are shown. Full list is provided in Table S3. B) The heatmap shows the enrichment (one-sided Fisher’s exact test) of EPs in different metabolite sub-pathways. See Table S3 for the full list.



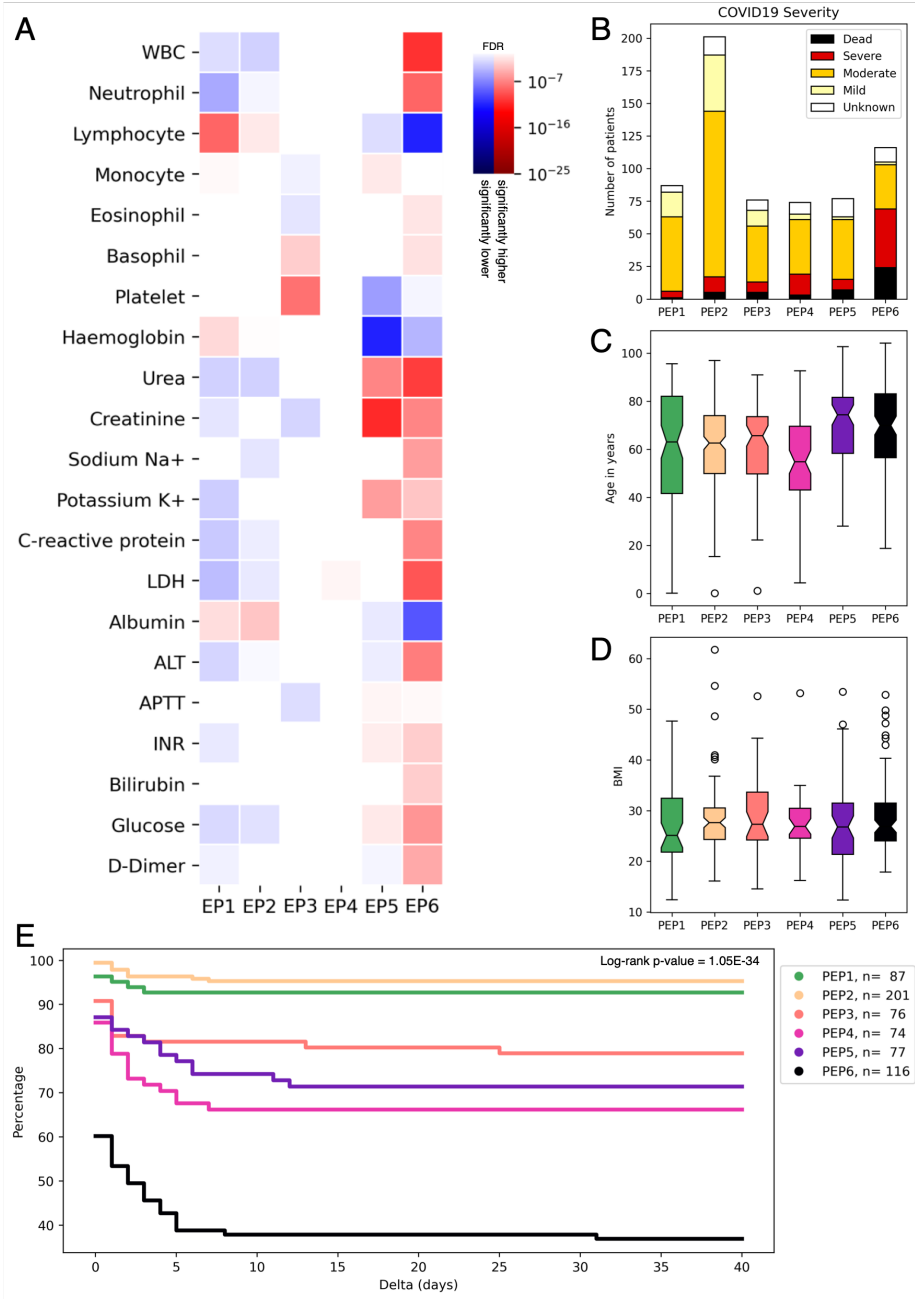

568

569 **Figure 5:** Differential expression patterns of blood markers in the identified endophenotypes  
 570 (EPs) and characterization of predicted endophenotypes (PEPs) based on the predictive model.  
 571 A) Heatmaps of false discovery rates (FDR) values for two-sided one-vs-rest Mann–Whitney U  
 572 tests for 21 blood markers for each EP. Abbreviations used: WBC = white blood cells, LDH = lactate  
 573 deshydrogenase, ALT = alanine aminotransferase, APTT = activated partial thromboplastin time,  
 574 INR = International Normalized Ratio. FDR values below 0.05 are shown as white. B) World health  
 575 organization COVID-19 severity assessed in each PEP. C) Distribution of age in each PEP. D)  
 576 Distribution of BMI in each PEP. E) Kaplan-Meier analysis of the time between patients' admission  
 577 to the hospital and their admission to ICU (or death if earlier) for each PEP (Delta). The colormap

578 in panel E shows the number of patients in each PEP group and the colors used to represent them  
579 in panels C, D, and E. PEPs were predicted based on blood markers and were not used to originally  
580 identify the EPs.



581 **Tables**

582 **Table 1:** Clinical and pathological characteristics of the BQC19's participants used in this study.

|                                            | <b>Cohort<br/>(n = 1,362)<br/>No. (%)</b> |      |
|--------------------------------------------|-------------------------------------------|------|
| <b>Age in years</b>                        | <45                                       | 17.5 |
|                                            | 45-65                                     | 33.6 |
|                                            | >65                                       | 48.7 |
|                                            | Unknown                                   | 0.3  |
| <b>Body mass index in kg/m<sup>2</sup></b> | <20                                       | 3.8  |
|                                            | 20-25                                     | 13.0 |
|                                            | 25-35                                     | 27.8 |
|                                            | >35                                       | 7.4  |
|                                            | Unknow                                    | 47.9 |
| <b>Sex at birth</b>                        | Female                                    | 44.8 |
|                                            | Male                                      | 55.2 |
| <b>Severity</b>                            | Dead                                      | 4.4  |
|                                            | Severe                                    | 21.8 |
|                                            | Moderate                                  | 51.0 |
|                                            | Mild                                      | 11.8 |
|                                            | Unknown                                   | 10.9 |
| <b>Oxygen therapy</b>                      | Yes                                       | 48.2 |
|                                            | No                                        | 21.0 |
|                                            | Unknown                                   | 30.8 |
| <b>Ventilatory support</b>                 | Yes                                       | 47.6 |
|                                            | No                                        | 14.0 |
|                                            | Unknown                                   | 38.5 |
| <b>Admission to intensive care unit</b>    | Yes                                       | 17.5 |
|                                            | No                                        | 33.6 |
|                                            | Unknown                                   | 48.7 |

583

584 **Table 2:** Reactome pathways associated with EP6, based on expression of aptamers. KnowEnG  
585 analytical platform was used. The p-values were calculated using a one-sided Fisher's exact test  
586 and were corrected for multiple tests using Benjamini-Hochberg method. Only signaling  
587 pathways with  $FDR < 5E-4$  are shown in this table (see Table S4 for the full list).  
588

| Pathway                                           | FDR      |
|---------------------------------------------------|----------|
| Signaling by Interleukins                         | 2.75E-12 |
| Cytokine Signaling in Immune system               | 6.25E-10 |
| Immune System                                     | 2.28E-06 |
| Signaling by FGFR                                 | 4.75E-06 |
| Constitutive Signaling by Aberrant PI3K in Cancer | 2.94E-05 |
| FGFR2 ligand binding and activation               | 5.77E-05 |
| Extracellular matrix organization                 | 1.85E-04 |
| FGFR3 ligand binding and activation               | 1.85E-04 |
| FGFR3c ligand binding and activation              | 1.85E-04 |
| FGFRL1 modulation of FGFR1 signaling              | 1.85E-04 |
| TNFs bind their physiological receptors           | 2.58E-04 |
| PI3K/AKT Signaling in Cancer                      | 3.28E-04 |
| PI5P, PP2A and IER3 Regulate PI3K/AKT Signaling   | 4.14E-04 |
| Interleukin-4 and 13 signaling                    | 4.91E-04 |

589  
590

591 **Table 3:** SNVs differentiating EP6 against all other endophenotype clusters.

| SNV ID     | Position        | Gene Symbol     | SNV <sup>1</sup> | MAF   | HWE    | OR <sup>2</sup> | p-value  |
|------------|-----------------|-----------------|------------------|-------|--------|-----------------|----------|
| rs1394671  | chr5:7348567    | -               | G > A            | 0.240 | 0.095  | 2.28            | 2.41E-06 |
| rs12186698 | chr5:168880668  | <i>SLIT3</i>    | T > C            | 0.087 | 0.247  | 2.93            | 3.72E-06 |
| rs11625406 | chr14:50049474  | -               | C > A            | 0.438 | 0.137  | 0.47            | 1.03E-05 |
| rs11862889 | chr16:83828886  | -               | T > C            | 0.104 | 0.446  | 2.62            | 1.07E-05 |
| rs2995918  | chr4:37905775   | <i>TBC1D1</i>   | C > T            | 0.494 | 0.776  | 0.49            | 1.20E-05 |
| rs16897810 | chr5:68415296   | -               | G > A            | 0.093 | 0.001  | 2.67            | 1.43E-05 |
| rs2376263  | chr17:35436659  | <i>SLFN13</i>   | G > A            | 0.261 | 0.073  | 2.01            | 2.48E-05 |
| rs4790712  | chr17:1614620   | <i>SLC43A2</i>  | G > A            | 0.441 | 0.003  | 1.97            | 2.50E-05 |
| rs2294566  | chr20:41472939  | <i>CHD6</i>     | C > A            | 0.239 | 0.265  | 2.04            | 2.78E-05 |
| rs7164451  | chr15:48921859  | <i>SHC4</i>     | G > A            | 0.386 | 0.053  | 1.89            | 3.01E-05 |
| rs57664621 | chr8:22808443   | <i>PEBP4</i>    | G > C            | 0.174 | 0.016  | 2.16            | 3.07E-05 |
| rs28482919 | chr3:14903094   | <i>FGD5</i>     | T > C            | 0.187 | 0.053  | 0.32            | 3.20E-05 |
| rs6559283  | chr9:89712560   | -               | T > C            | 0.375 | <0.001 | 1.96            | 3.27E-05 |
| rs657075   | chr5:132094425  | -               | A > G            | 0.104 | 0.328  | 2.49            | 4.28E-05 |
| rs56235109 | chr15:62424001  | <i>TLN2</i>     | A > G            | 0.235 | 0.366  | 0.38            | 4.67E-05 |
| rs7620057  | chr3:179473377  | <i>GNB4</i>     | T > C            | 0.099 | 1.000  | 2.51            | 4.67E-05 |
| rs10466868 | chr12:131455375 | -               | T > G            | 0.108 | 0.401  | 2.51            | 5.94E-05 |
| rs2236798  | chr1:18735127   | <i>PAX7</i>     | A > G            | 0.054 | 0.114  | 2.90            | 6.11E-05 |
| rs3774814  | chr4:5464702    | <i>STK32B</i>   | C > G            | 0.205 | <0.001 | 0.36            | 6.75E-05 |
| rs4497815  | chr19:22903215  | -               | G > A            | 0.216 | 0.205  | 2.07            | 7.52E-05 |
| rs6765694  | chr3:54601810   | <i>CACNA2D3</i> | G > A            | 0.404 | 0.833  | 0.51            | 7.66E-05 |
| rs2797773  | chr6:37559045   | -               | C > T            | 0.422 | 0.000  | 0.53            | 8.06E-05 |
| rs17014760 | chr4:129419725  | -               | A > A            | 0.316 | 0.000  | 1.89            | 9.33E-05 |
| rs10948260 | chr6:45835559   | -               | G > A            | 0.366 | 0.189  | 1.81            | 9.52E-05 |
| rs12035677 | chr1:232391209  | -               | A > G            | 0.063 | 0.000  | 3.02            | 9.95E-05 |

592 Abbreviations used: SNV = Single nucleotide variation, HWE = Hardy Weinberg Equilibrium, MAF  
 593 = Minor allele frequency, OR = Odd ratio.

594  
 595 <sup>1</sup> SNV are described following GWAS annotations: refence allele > alternative allele (e.g., G > A).

596 <sup>2</sup> Logistic regression analyses using additive model adjusted for the 2 principal components.

597

598 **Table 4:** Association between genotypes and aptamer expression levels

| SNV        | Gene Symbol     | Nearest gene | Aptamers normalized expression <sup>1</sup> |                 |                   |                    | Multiple logistic regression analyses <sup>3</sup> |        |                     |        |
|------------|-----------------|--------------|---------------------------------------------|-----------------|-------------------|--------------------|----------------------------------------------------|--------|---------------------|--------|
|            |                 |              | HM <sub>ref</sub>                           | HTZ             | HM <sub>alt</sub> | p-val <sup>2</sup> | Aptamers OR                                        | p-val  | SNV OR              | p-val  |
| rs6765694  | <i>CACNA2D3</i> | -            | -0.09<br>(±0.89)                            | 0.01<br>(±1.10) | 0.24 *<br>(±0.99) | <b>0.011</b>       | 0.61<br>(0.46-0.79)                                | 2.5E-4 | 0.52<br>(0.37-0.74) | 2.4E-4 |
| rs10948260 | -               | <i>CLIC5</i> | 0.02<br>(±0.92)                             | 0.02<br>(±1.09) | -0.02<br>(±0.97)  | 0.796              | 0.68<br>(0.55-0.83)                                | 1.7E-4 | 1.83<br>(1.35-2.48) | 8.8E-5 |
| rs657075   | -               | <i>IL3</i>   | -0.01<br>(±1.01)                            | 0.05<br>(±0.99) | 0.32<br>(±0.46)   | 0.328              | 1.37<br>(1.14-11.64)                               | 8.2E-4 | 2.49<br>(1.60-3.88) | 5.2E-5 |
| rs7164451  | <i>SHC4</i>     | -            | -0.07<br>(±0.90)                            | 0.01<br>(±1.05) | 0.23 *<br>(±1.16) | <b>0.017</b>       | 11.98<br>(7.61-18.87)                              | 8.4E-  | 2.00<br>(1.30-3.09) | 1.8E-3 |
| rs12186698 | <i>SLIT3</i>    | -            | 0.00<br>(±1.02)                             | 0.07<br>(±1.06) | 0.15<br>(±0.89)   | 0.509              | 0.82<br>(0.64-1.06)                                | 0.135  | 2.99<br>(1.89-4.73) | 2.7E-6 |
| rs56235109 | <i>TLN2</i>     | -            | -0.03<br>(±0.98)                            | 0.06<br>(±1.03) | 0.04<br>(±1.27)   | 0.353              | 0.58<br>(0.45-0.75)                                | 2.7E-5 | 0.38<br>(0.23-0.60) | 4.7E-5 |

599 Abbreviations used: SNV = Single nucleotide variation, HM<sub>ref</sub> = Homozygotes for the reference  
600 allele, HM<sub>alt</sub> = Homozygotes for the alternative allele, HTZ = Heterozygotes, OR = Odd ratio.

601  
602 <sup>1</sup> Aptamers' normalized levels of expression are reported as mean (± standard deviation).  
603 Normalization steps for aptamer expressions are described in Methods.

604 <sup>2</sup> p-value, standard ANOVA analyses followed by Tukey *post hoc* analyses. Asterisks (\*) identify  
605 difference between HM<sub>ref</sub> and HM<sub>alt</sub> genotypes.

606 <sup>3</sup> Multiple logistic regression analyses models include aptamers expression values, SNV  
607 genotypes (additive model) and the two principal components. OR are reported with 95%  
608 confidence intervals in parentheses.

## 609 References

- 610 1 Rubin, R. As their numbers grow, COVID-19 “long haulers” stump experts. *Jama* **324**,  
611 1381-1383 (2020).
- 612 2 Marshall, J. C. *et al.* A minimal common outcome measure set for COVID-19 clinical  
613 research. *The Lancet Infectious Diseases* **20**, e192-e197 (2020).
- 614 3 Hull, D. L. in *PSA: Proceedings of the biennial meeting of the philosophy of science*  
615 *association*. 653-670 (Cambridge University Press).
- 616 4 Berrettini, W. H. Genetic bases for endophenotypes in psychiatric disorders. *Dialogues*  
617 *Clin Neurosci* **7**, 95-101 (2005). <https://doi.org/10.31887/DCNS.2005.7.2/wberrettini>
- 618 5 Russell, C. D. & Baillie, J. K. Treatable traits and therapeutic targets: goals for systems  
619 biology in infectious disease. *Current opinion in systems biology* **2**, 140-146 (2017).
- 620 6 Blatti III, C. *et al.* Knowledge-guided analysis of "omics" data using the KnowEnG cloud  
621 platform. *PLoS biology* **18**, e3000583 (2020).  
622 <https://doi.org/10.1371/journal.pbio.3000583>
- 623 7 Emad, A. *et al.* Superior breast cancer metastasis risk stratification using an epithelial-  
624 mesenchymal-amoeboid transition gene signature. *Breast Cancer Research* **22**, 74 (2020).  
625 <https://doi.org/10.1186/s13058-020-01304-8>
- 626 8 Te Pas, M. F. W., Madsen, O., Calus, M. P. L. & Smits, M. A. The Importance of  
627 Endophenotypes to Evaluate the Relationship between Genotype and External  
628 Phenotype. *International Journal of Molecular Sciences* **18**, 472 (2017).
- 629 9 Al-Hadrawi, D. S., Al-Rubaye, H. T., Almulla, A. F., Al-Hakeim, H. K. & Maes, M. Lowered  
630 oxygen saturation and increased body temperature in acute COVID-19 largely predict  
631 chronic fatigue syndrome and affective symptoms due to Long COVID: A precision  
632 nomothetic approach. *Acta Neuropsychiatr*, 1-12 (2022).  
633 <https://doi.org/10.1017/neu.2022.21>
- 634 10 Tremblay, K. *et al.* The Biobanque québécoise de la COVID-19 (BQC19)—A cohort to  
635 prospectively study the clinical and biological determinants of COVID-19 clinical  
636 trajectories. *PloS one* **16**, e0245031 (2021).  
637 <https://doi.org/10.1371/journal.pone.0245031>
- 638 11 Gold, L. *et al.* Aptamer-based multiplexed proteomic technology for biomarker discovery.  
639 *Nature Precedings*, 1-1 (2010).
- 640 12 Ward Jr, J. H. Hierarchical grouping to optimize an objective function. *Journal of the*  
641 *American statistical association* **58**, 236-244 (1963).
- 642 13 Murtagh, F. & Legendre, P. Ward’s Hierarchical Agglomerative Clustering Method: Which  
643 Algorithms Implement Ward’s Criterion? *Journal of Classification* **31**, 274-295 (2014).  
644 <https://doi.org/10.1007/s00357-014-9161-z>
- 645 14 Kaplan, E. L. & Meier, P. Nonparametric Estimation from Incomplete Observations.  
646 *Journal of the American Statistical Association* **53**, 457-481 (1958).  
647 <https://doi.org/10.1080/01621459.1958.10501452>
- 648 15 Gillespie, M. *et al.* The reactome pathway knowledgebase 2022. *Nucleic Acids Research*  
649 **50**, D687-D692 (2021). <https://doi.org/10.1093/nar/gkab1028>
- 650 16 Thomas, T. *et al.* COVID-19 infection alters kynurenine and fatty acid metabolism,  
651 correlating with IL-6 levels and renal status. *JCI insight* **5** (2020).

- 652 17 Zahedi, K. *et al.* The role of spermidine/spermine N 1-acetyltransferase in endotoxin-  
653 induced acute kidney injury. *American Journal of Physiology-Cell Physiology* **299**, C164-  
654 C174 (2010).
- 655 18 Pirnes-Karhu, S. *et al.* Spermidine/spermine N1-acetyltransferase activity associates with  
656 white blood cell count in myeloid leukemias. *Experimental Hematology* **42**, 574-580  
657 (2014).
- 658 19 Marfia, G. *et al.* Decreased serum level of sphingosine-1-phosphate: a novel predictor of  
659 clinical severity in COVID-19. *EMBO molecular medicine* **13**, e13424 (2021).
- 660 20 Lachkar, F., Ferré, P., Foufelle, F. & Papaioannou, A. Dihydroceramides: their emerging  
661 physiological roles and functions in cancer and metabolic diseases. *American Journal of*  
662 *Physiology-Endocrinology and Metabolism* **320**, E122-E130 (2021).
- 663 21 Lone, M. A. *et al.* Subunit composition of the mammalian serine-palmitoyltransferase  
664 defines the spectrum of straight and methyl-branched long-chain bases. *Proceedings of*  
665 *the National Academy of Sciences* **117**, 15591-15598 (2020).
- 666 22 Han, G. *et al.* Identification of small subunits of mammalian serine palmitoyltransferase  
667 that confer distinct acyl-CoA substrate specificities. *Proceedings of the National Academy*  
668 *of Sciences* **106**, 8186-8191 (2009).
- 669 23 Blachier, F., Andriamihaja, M. & Blais, A. Sulfur-Containing Amino Acids and Lipid  
670 Metabolism. *The Journal of Nutrition* **150**, 2524S-2531S (2020).  
671 <https://doi.org/10.1093/jn/nxaa243>
- 672 24 Ye, C., Sutter, B. M., Wang, Y., Kuang, Z. & Tu, B. P. A metabolic function for phospholipid  
673 and histone methylation. *Molecular cell* **66**, 180-193. e188 (2017).
- 674 25 Parman, T. *et al.* Toxicogenomics and metabolomics of pentamethylchromanol (PMCol)-  
675 induced hepatotoxicity. *Toxicological Sciences* **124**, 487-501 (2011).
- 676 26 Stafford, J. H. & Thorpe, P. E. Increased exposure of phosphatidylethanolamine on the  
677 surface of tumor vascular endothelium. *Neoplasia* **13**, 299-IN292 (2011).
- 678 27 Ran, S., Downes, A. & Thorpe, P. E. Increased exposure of anionic phospholipids on the  
679 surface of tumor blood vessels. *Cancer research* **62**, 6132-6140 (2002).
- 680 28 Port, J. R. *et al.* High-fat high-sugar diet-induced changes in the lipid metabolism are  
681 associated with mildly increased COVID-19 severity and delayed recovery in the Syrian  
682 hamster. *Viruses* **13**, 2506 (2021).
- 683 29 Ataga, K. I. Hypercoagulability and thrombotic complications in hemolytic anemias.  
684 *Haematologica* **94**, 1481-1484 (2009). <https://doi.org/10.3324/haematol.2009.013672>
- 685 30 Sinauridze, E. I. *et al.* Platelet microparticle membranes have 50-to 100-fold higher  
686 specific procoagulant activity than activated platelets. *Thrombosis and haemostasis* **97**,  
687 425-434 (2007).
- 688 31 Tavoosi, N. *et al.* Molecular Determinants of Phospholipid Synergy in Blood Clotting \*.  
689 *Journal of Biological Chemistry* **286**, 23247-23253 (2011).  
690 <https://doi.org/10.1074/jbc.M111.251769>
- 691 32 Majumder, R., Liang, X., Quinn-Allen, M. A., Kane, W. H. & Lentz, B. R. Modulation of  
692 prothrombinase assembly and activity by phosphatidylethanolamine. *Journal of*  
693 *Biological Chemistry* **286**, 35535-35542 (2011).
- 694 33 Kim, K. *et al.* Pro-coagulant and pro-thrombotic effects of paclitaxel mediated by red  
695 blood cells. *Thrombosis and Haemostasis* **118**, 1765-1775 (2018).

- 696 34 Sato, K., Iemitsu, M., Aizawa, K. & Ajsaka, R. Testosterone and DHEA activate the glucose  
697 metabolism-related signaling pathway in skeletal muscle. *American Journal of Physiology-  
698 Endocrinology and Metabolism* **294**, E961-E968 (2008).
- 699 35 Kajita, K. *et al.* Glucocorticoid-induced insulin resistance associates with activation of  
700 protein kinase C isoforms. *Cellular signalling* **13**, 169-175 (2001).
- 701 36 MacDonald, J. & Sprecher, H. Distribution of arachidonic acid in choline-and  
702 ethanolamine-containing phosphoglycerides in subfractionated human neutrophils.  
703 *Journal of Biological Chemistry* **264**, 17718-17726 (1989).
- 704 37 Papageorgiou, C. *et al.* Disseminated intravascular coagulation: an update on  
705 pathogenesis, diagnosis, and therapeutic strategies. *Clinical and Applied  
706 Thrombosis/Hemostasis* **24**, 8S-28S (2018).
- 707 38 Esaki, Y., Hirokawa, K., Fukazawa, T. & Matsuda, T. Immunohistochemical study on the  
708 liver in autopsy cases with disseminated intravascular coagulation (DIC) with reference to  
709 clinicopathological analysis. *Virchows Archiv A* **404**, 229-241 (1984).
- 710 39 Barnes, B. J. *et al.* Targeting potential drivers of COVID-19: Neutrophil extracellular traps.  
711 *Journal of Experimental Medicine* **217** (2020).
- 712 40 Bonaventura, A. *et al.* Endothelial dysfunction and immunothrombosis as key pathogenic  
713 mechanisms in COVID-19. *Nature Reviews Immunology* **21**, 319-329 (2021).
- 714 41 Ding, J. *et al.* A network-informed analysis of SARS-CoV-2 and hemophagocytic  
715 lymphohistiocytosis genes' interactions points to Neutrophil extracellular traps as  
716 mediators of thrombosis in COVID-19. *PLoS Computational Biology* **17**, e1008810 (2021).  
717 <https://doi.org/10.1371/journal.pcbi.1008810>
- 718 42 Blasco, A. *et al.* Assessment of neutrophil extracellular traps in coronary thrombus of a  
719 case series of patients with COVID-19 and myocardial infarction. *JAMA cardiology* **6**, 469-  
720 474 (2021).
- 721 43 Desilles, J. P. *et al.* Impact of COVID-19 on thrombus composition and response to  
722 thrombolysis: Insights from a monocentric cohort population of COVID-19 patients with  
723 acute ischemic stroke. *Journal of Thrombosis and Haemostasis* **20**, 919-928 (2022).
- 724 44 Englert, H. *et al.* Defective NET clearance contributes to sustained FXII activation in  
725 COVID-19-associated pulmonary thrombo-inflammation. *EBioMedicine* **67**, 103382  
726 (2021).
- 727 45 Leppkes, M. *et al.* Vascular occlusion by neutrophil extracellular traps in COVID-19.  
728 *EBioMedicine* **58**, 102925 (2020).
- 729 46 Middleton, E. A. *et al.* Neutrophil extracellular traps contribute to immunothrombosis in  
730 COVID-19 acute respiratory distress syndrome. *Blood* **136**, 1169-1179 (2020).
- 731 47 Obermayer, A. *et al.* Neutrophil extracellular traps in fatal COVID-19-associated lung  
732 injury. *Disease markers* **2021** (2021).
- 733 48 Ouwendijk, W. J. *et al.* High levels of neutrophil extracellular traps persist in the lower  
734 respiratory tract of critically ill patients with coronavirus disease 2019. *The Journal of  
735 infectious diseases* **223**, 1512-1521 (2021).
- 736 49 Petito, E. *et al.* Association of neutrophil activation, more than platelet activation, with  
737 thrombotic complications in coronavirus disease 2019. *The Journal of infectious diseases*  
738 **223**, 933-944 (2021).



- 739 50 Skendros, P. *et al.* Complement and tissue factor–enriched neutrophil extracellular traps  
740 are key drivers in COVID-19 immunothrombosis. *The Journal of clinical investigation* **130**,  
741 6151-6157 (2020).
- 742 51 Smadja, D. M. *et al.* Placental growth factor level in plasma predicts COVID-19 severity  
743 and in-hospital mortality. *Journal of Thrombosis and Haemostasis* **19**, 1823-1830 (2021).
- 744 52 Bussolari, C. *et al.* Case Report: Nintedaninb May Accelerate Lung Recovery in Critical  
745 Coronavirus Disease 2019. *Frontiers in Medicine* **8**, 766486 (2021).
- 746 53 Liu, W., Peng, Y. & Tobin, D. J. A new 12-gene diagnostic biomarker signature of melanoma  
747 revealed by integrated microarray analysis. *PeerJ* **1**, e49 (2013).  
748 <https://doi.org/10.7717/peerj.49>
- 749 54 Zhou, S. *et al.* A Neanderthal OAS1 isoform protects individuals of European ancestry  
750 against COVID-19 susceptibility and severity. *Nature Medicine* **27**, 659-667 (2021).  
751 <https://doi.org/10.1038/s41591-021-01281-1>
- 752 55 Ford, L. *et al.* Precision of a Clinical Metabolomics Profiling Platform for Use in the  
753 Identification of Inborn Errors of Metabolism. *The Journal of Applied Laboratory Medicine*  
754 **5**, 342-356 (2020). <https://doi.org/10.1093/jalm/jfz026>
- 755 56 Durinck, S., Spellman, P. T., Birney, E. & Huber, W. Mapping identifiers for the integration  
756 of genomic datasets with the R/Bioconductor package biomaRt. *Nature Protocols* **4**, 1184-  
757 1191 (2009). <https://doi.org/10.1038/nprot.2009.97>
- 758 57 R Core Team. *R: A Language and Environment for Statistical Computing*. [https://www.R-](https://www.R-project.org/)  
759 [project.org/](https://www.R-project.org/). (R Foundation for Statistical Computing, Vienna, Austria, 2022).
- 760 58 Marees, A. T. *et al.* A tutorial on conducting genome-wide association studies: Quality  
761 control and statistical analysis. *Int J Methods Psychiatr Res* **27**, e1608 (2018).  
762 <https://doi.org/10.1002/mpr.1608>
- 763 59 Ochoa, A. genio: Genetics Input/Output Functions. R package version 1.1.1.  
764 <https://CRAN.R-project.org/package=genio> (2022).
- 765 60 Warnes, G., Gorjanc, G., Leisch, F. & Man, M. genetics: Population Genetics. R package  
766 version 1.3.8.1.3. <https://CRAN.R-project.org/package=genetics> (2021).
- 767 61 Zheng, X. *et al.* A high-performance computing toolset for relatedness and principal  
768 component analysis of SNP data. *Bioinformatics* **28**, 3326-3328 (2012).  
769 <https://doi.org/10.1093/bioinformatics/bts606>
- 770 62 Perdry, H. & Dandine-Roulland, C. gaston: Genetic Data Handling (QC, GRM, LD, PCA) &  
771 Linear Mixed Models. R package version 1.5.7. [https://CRAN.R-](https://CRAN.R-project.org/package=gaston)  
772 [project.org/package=gaston](https://CRAN.R-project.org/package=gaston) (2020).
- 773 63 Satopaa, V., Albrecht, J., Irwin, D. & Raghavan, B. in *2011 31st international conference on*  
774 *distributed computing systems workshops*. 166-171 (IEEE).  
775
